# Supplementary material
Source: PubMed Central journal article supplement (PMC1959477)

**control**

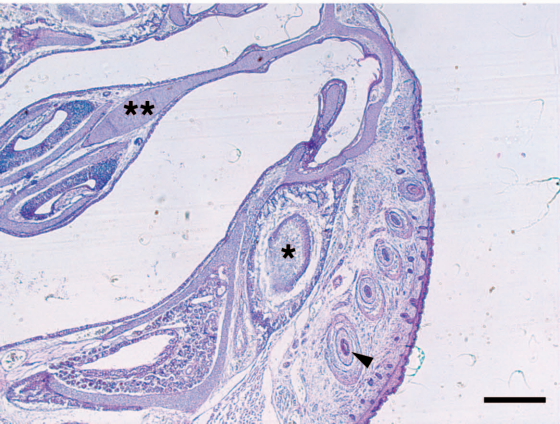

**DT**

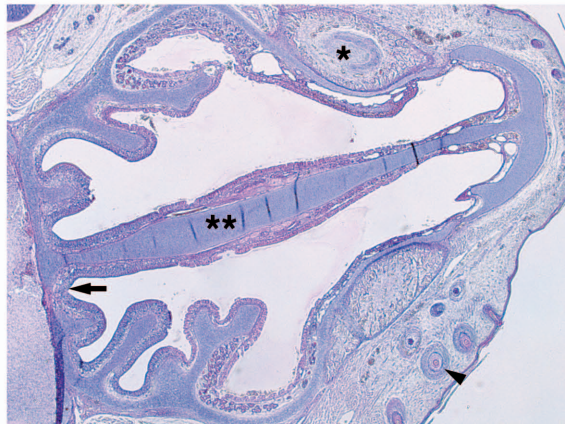

Supplement: amjpathol_ajpath.2007.060991_1.pdf [file amjpathol_ajpath.2007.060991_1.pdf]
